# Supplementary material
Source: Research Square preprint supplement (doi:10.21203/rs.3.rs-9361439/v1)
Supplement: Supplementary file 1 [file 7dfafb15646812d19c188577.docx]

To access the supplementary materials, including the data and proof-of-concept pipeline, please refer to the first author’s GitHub at this URL: [https://github.com/micheal-farzadnia/a-cvg-mlt-app-dfc-anlss-sz](To%20access%20the%20supplementary%20materials,%20including%20the%20data%20and%20proof-of-concept%20pipeline,%20please%20refer%20to%20the%20first%20author’s%20GitHub%20at%20this%20URL:%20https:/github.com/micheal-farzadnia/a-cvg-mlt-app-dfc-anlss-sz)
